# Supplementary material
Source: MDPI journal article supplement (https://www.mdpi.com/2504-477X/7/9/395)
Supplement: s1 [file s1]

## Supplementary Material

# Facile Fabrication of Absorption-Dominated Biodegradable Poly(Lactic Acid)/Polycaprolactone/Multi-walled Carbon Nanotube Foams towards Electromagnetic Interference Shielding<sup>8</sup>

Tong Liu <sup>1,2</sup>, Huiyao Feng <sup>2</sup>, Weiqiang Zeng <sup>2</sup>, Chenhong Jin <sup>2</sup> and Tairong Kuang <sup>2,\*</sup>

<sup>1</sup> Department of Polymer Science and Engineering, Zhejiang University, Hangzhou 310027, China

<sup>2</sup> Zhejiang Key Laboratory of Plastic Modification and Processing Technology, College of Material Science and Engineering, Zhejiang University of Technology, Hangzhou 310014, China

\* Correspondence: kuangtr@zjut.edu.cn

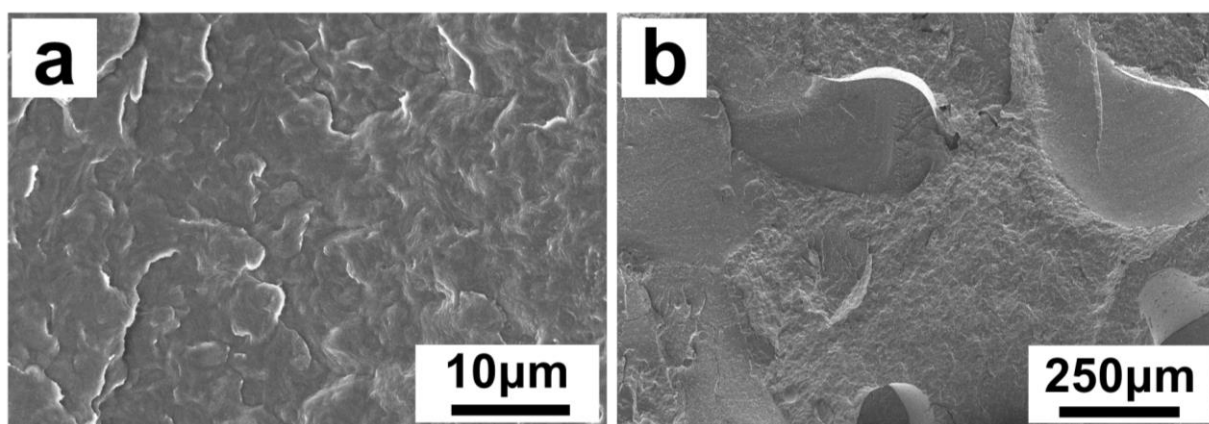

**Figure S1.** SEM images of cryo-fractured surfaces of neat PCL (a) and PCL/PLA blend (b).

**Table S1.** Electrical conductivity of PCL/xC and PCL/PLA/xC composites.

| Sample       | Conductivity (S/m)     |
|--------------|------------------------|
| PCL          | $5.10 \times 10^{-11}$ |
| PCL/1CNT     | 4.12                   |
| PCL/3CNT     | 87.65                  |
| PCL/5CNT     | 97.82                  |
| PCL/7CNT     | 142.10                 |
| PCL/PLA      | $3.04 \times 10^{-12}$ |
| PCL/PLA/1CNT | 11.32                  |
| PCL/PLA/3CNT | 95.52                  |
| PCL/PLA/5CNT | 123.63                 |
| PCL/PLA/7CNT | 179.49                 |

**Table S2.** Compressive properties of various f-PCL/PLA/xC samples.

| <b>Sample</b>  | <b>Compressive yield strength (MPa)</b> | <b>Compressive modulus (MPa)</b> |
|----------------|-----------------------------------------|----------------------------------|
| f-PCL/PLA/1CNT | 0.39±0.03                               | 5.22±0.37                        |
| f-PCL/PLA/3CNT | 0.39±0.05                               | 8.21±0.65                        |
| f-PCL/PLA/5CNT | 0.61±0.08                               | 14.53±1.36                       |
| f-PCL/PLA/7CNT | 0.69±0.06                               | 17.04±1.27                       |
